# Supplementary material for: An advanced composite sorbent with high thermal stability and superior sorption capacity without hysteresis for a better thermal battery
Source: Royal Society of Chemistry journal article supplement (doi:10.1039/d0ta01320j), 2020-01-01
Supplement: d0ta01320j1.pdf [file d0ta01320j1.pdf]

## Supporting Information for

### Advanced Composite Sorbent with High Thermal Stability and Superior Sorption Capacity without Hysteresis for a Better Thermal Battery

Guoliang An, Yiheng Zhang, Liwei Wang,\* and Bo Zhang

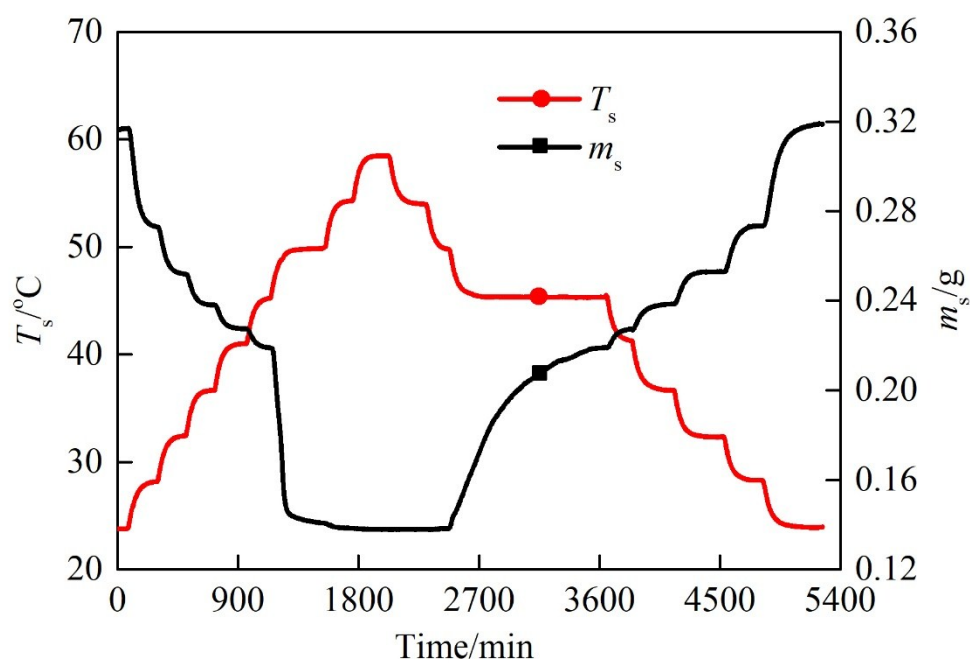

**Figure S1.** Test procedures of thermodynamic measurement, using condition of 0.87 MPa as example.

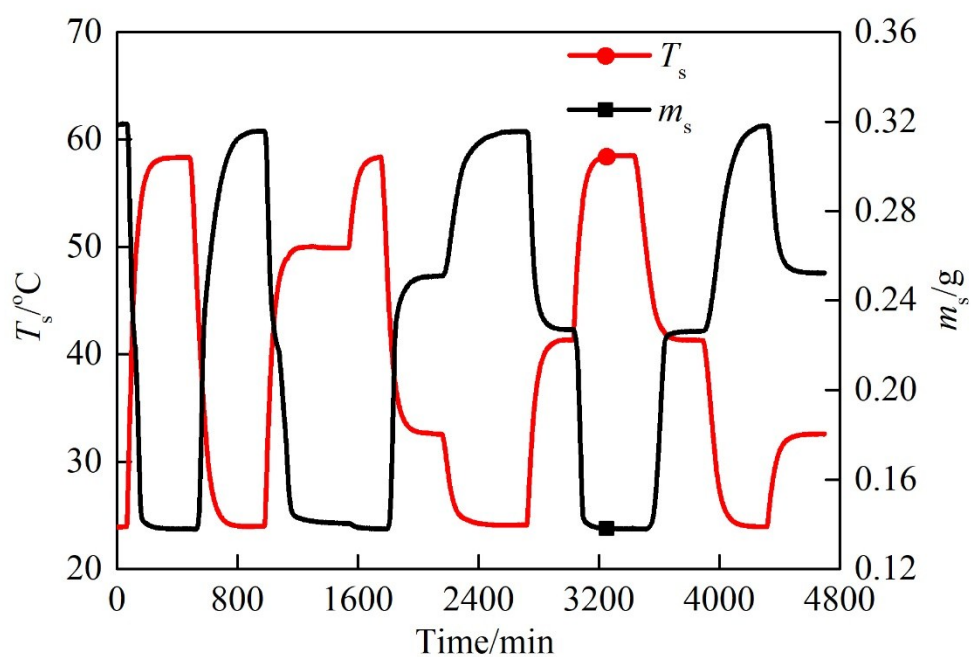

**Figure S2.** Test procedures of kinetic measurement, using condition of 0.87 MPa as example.

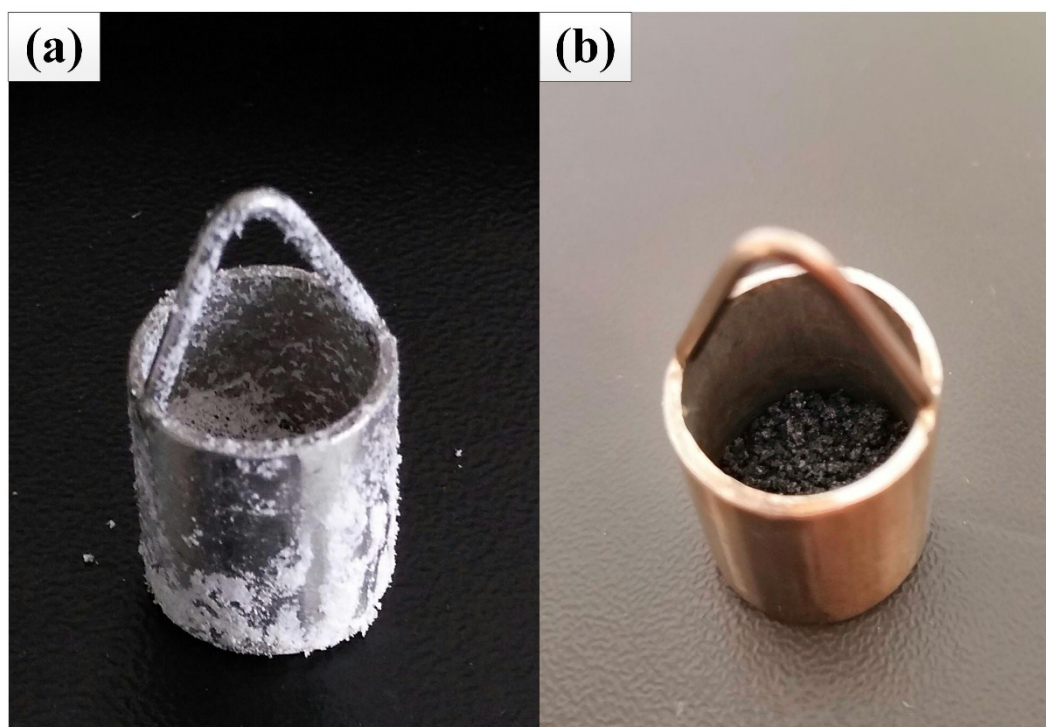

**Figure S3.** Comparison of  $\text{NH}_4\text{Cl}$  and EWN-Mec during pretreatment with Rubotherm balance: (a) pure  $\text{NH}_4\text{Cl}$  under the condition of vacuum and heating temperature of  $60^\circ\text{C}$ , (b) EWN-Mec under the condition of vacuum and heating temperature of  $120^\circ\text{C}$ .

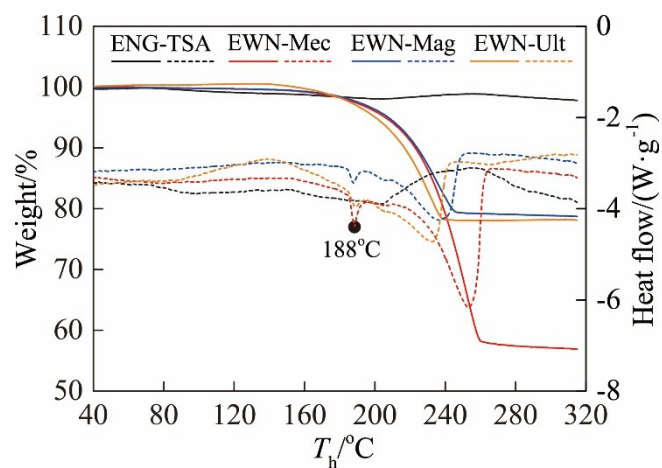

**Figure S4.** TG curves (solid lines) and DSC curves (dash lines) of ENG-TSA and EWNs.

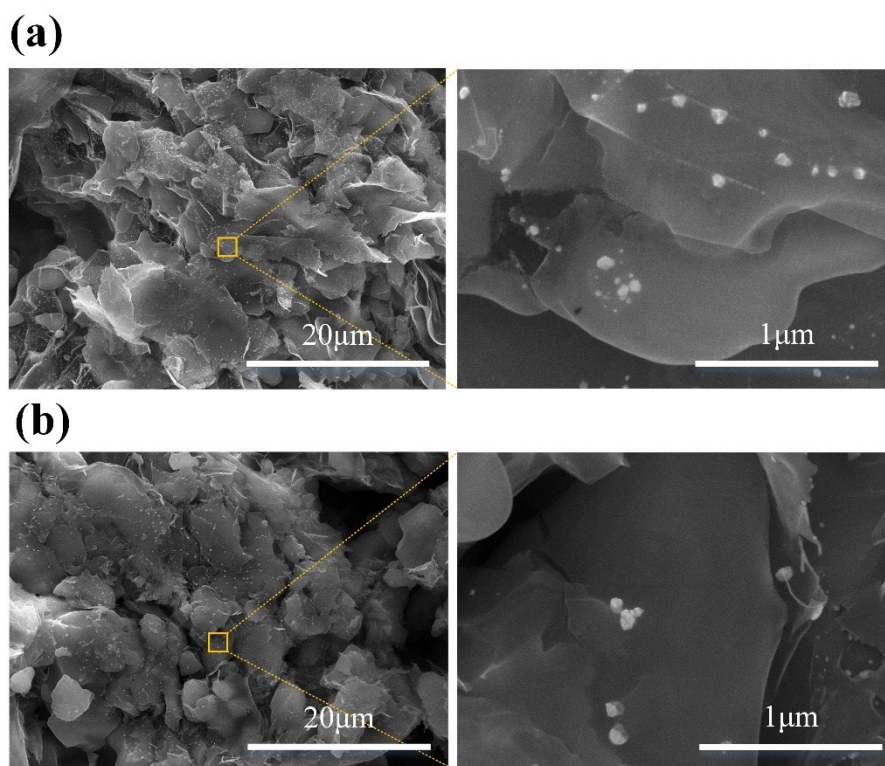

**Figure S5.** The SEM images: (a) EWN-Mag, (b) EWN-Ult.

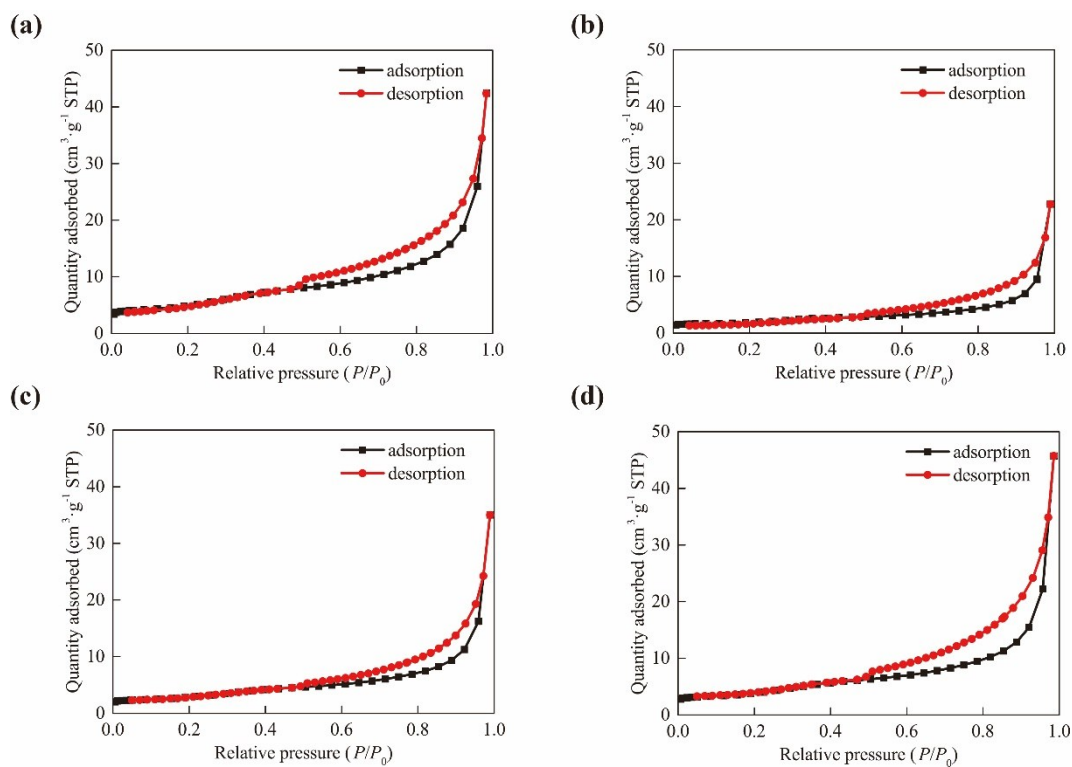

**Figure S6.** The nitrogen adsorption isotherms of: (a) ENG-TSA, (b) EWN-Mec, (c) EWN-Mag, (d) EWN-Ult.

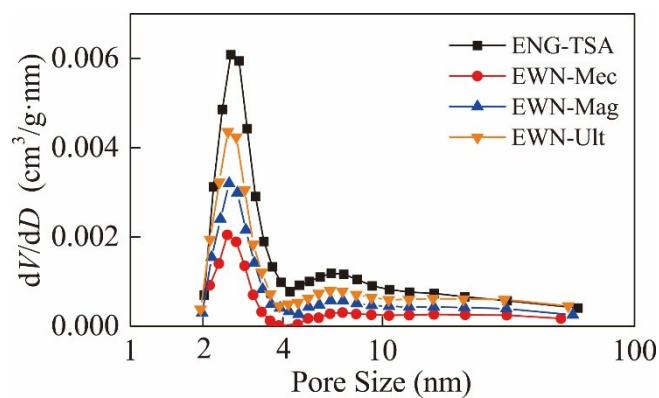

**Figure S7.** The BJH adsorption  $dV/dD$  pore size distribution of ENG-TSA and EWNs.

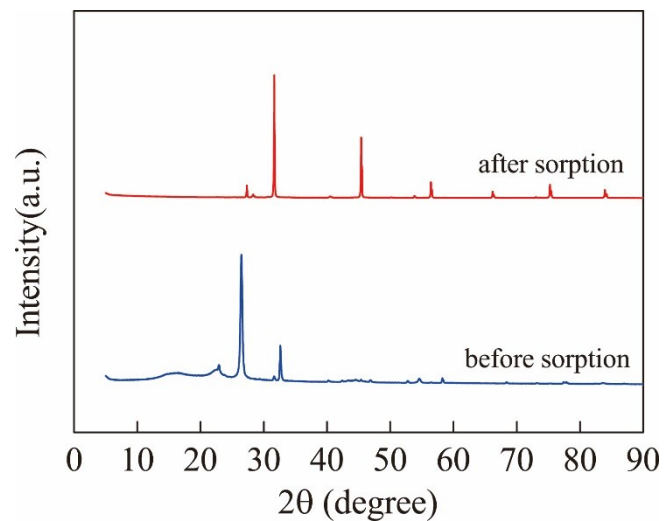

**Figure S8.** The XRD patterns of EWN-Mec before and after ammonia sorption test.

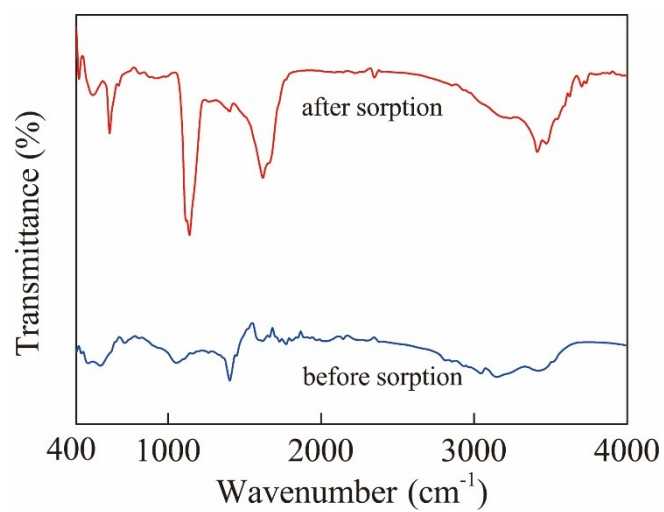

**Figure S9.** The FTIR spectra of EWN-Mec before and after ammonia sorption test.

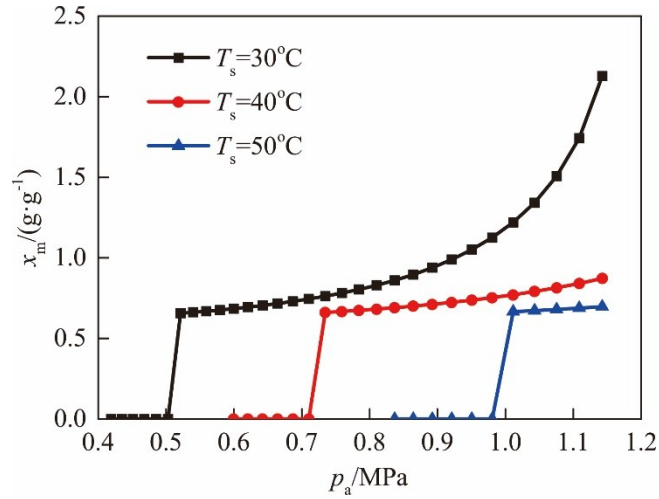

**Figure S10.** The ammonia sorption isotherms of EWN-Mec deduced from the D-A equation and Clapeyron equation.

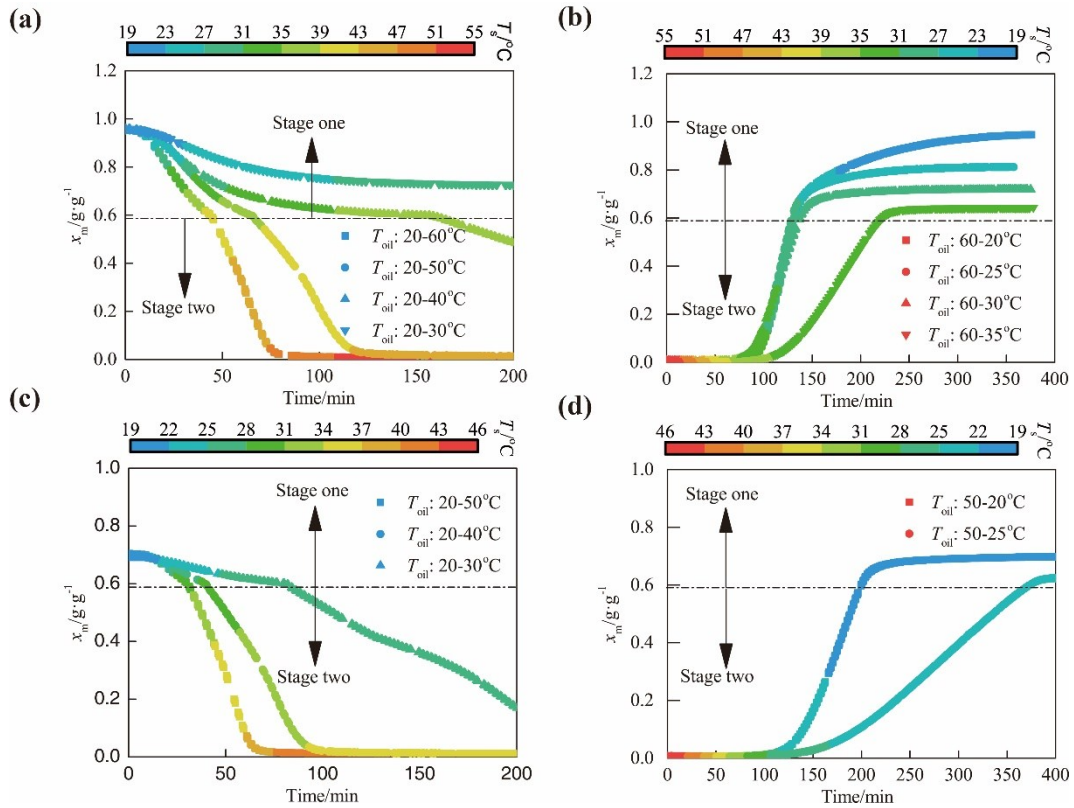

**Figure S11.** The kinetic characteristics of EWN-Mec-NH<sub>3</sub>: (a) desorption processes with the ending  $T_{oil}$  ranging from 30°C to 60°C, under 0.63 Mpa, (b) sorption processes with the ending  $T_{oil}$  ranging from 20°C to 35°C, under 0.63 Mpa, (c) desorption processes with the ending  $T_{oil}$  ranging from 30°C to 50°C, under 0.44 Mpa, (d) sorption processes with the ending  $T_{oil}$  ranging from 20°C to 25°C, under 0.44 MPa.

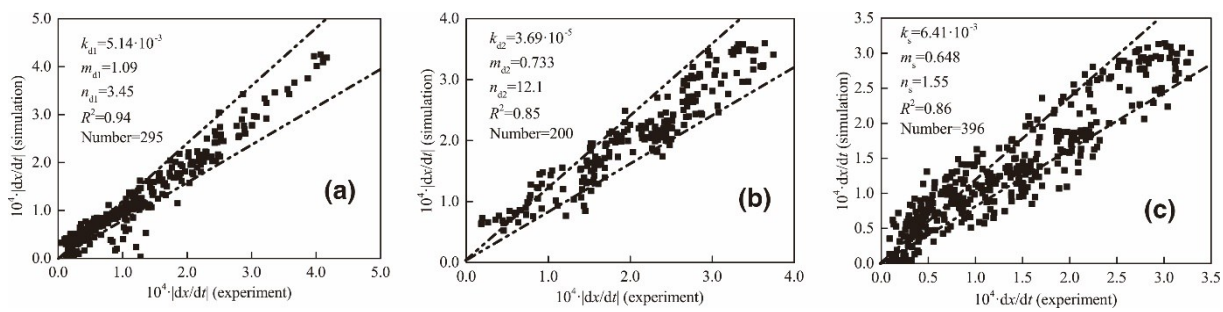

**Figure S12.** Kinetic simulation results: (a) the first stage desorption process, (b) the second stage desorption process, (c) the sorption process.

**Table S1.** Surface area, pore volume and pore size of the composites

| Summary Report                                          | ENG-TSA | EWN-Mec | EWN-Mag | EWN-Ult |
|---------------------------------------------------------|---------|---------|---------|---------|
| BET Surface Area ( $\text{m}^2 \cdot \text{g}^{-1}$ )   | 18      | 7       | 11      | 14      |
| Total pore volume ( $\text{cm}^3 \cdot \text{g}^{-1}$ ) | 0.033   | 0.013   | 0.019   | 0.028   |
| Pore diameter (nm)                                      | 2.5     | 2.4     | 2.5     | 2.4     |

**Table S2.** Kinetic model for EWN-Mec-NH<sub>3</sub>, where  $k$ ,  $m$  and  $n$  are the reaction rate, reaction order and pressure potential parameter, subscripts s and d represent sorption and desorption, respectively.

| Process                | Conditions  | Kinetic model                                                                                 |
|------------------------|-------------|-----------------------------------------------------------------------------------------------|
| Des. $\frac{dx_m}{dt}$ | $T_s < T_c$ | $-k_{1d} \cdot [x_m(T_s) - x_{eq}(T_s)]^{m_{1d}} \cdot \left(\frac{p_s}{p_c}\right)^{n_{1d}}$ |
|                        | $T_s > T_c$ | $-k_{2d} \cdot [x_m(T_s) - 0]^{m_{2d}} \cdot \left(\frac{p_s}{p_c}\right)^{n_{2d}}$           |
| Sor. $\frac{dx_m}{dt}$ | $T_s > T_c$ | 0                                                                                             |
|                        | $T_s < T_c$ | $k_s \cdot [x_{eq}(T_s) - x_m(T_s)]^{m_s} \cdot \left(1 - \frac{p_s}{p_c}\right)^{n_s}$       |
